# Supplementary material
Source: PubMed Central journal article supplement (PMC2635805)
Supplement: 0809533106_0809533106SI.pdf [file 0809533106_0809533106SI.pdf]

# Supporting Information

## Ramsey and Whiteley 10.1073/pnas.0809533106

### SI Materials and Methods

**Serum Sensitivity Assays.** For all serum sensitivity assays, bacteria were grown in 10% (vol/vol) CO<sub>2</sub>. The experiments shown in Fig. 5 were carried out under microaerophilic conditions. Microaerophilic medium was prepared by injecting 10 mL of aerobic brain heart infusion (BHI) broth into rubber-stopper-sealed Balch tubes, which were flushed with N<sub>2</sub> gas. Cultures were allowed to grow overnight and then diluted at least 1:5 into N<sub>2</sub>-flushed Balch tubes containing 4 mL of BHI broth. Cultures were grown 2 h to an OD<sub>600</sub> of 0.2 for *A. actinomycetemcomitans* and 0.4 for *S. gordonii* before treatment. Two hundred microliters of 5000 U/mL catalase (Sigma) or catalase that had been boiled for 10 min at 95 °C (heat inactivated) was added to an N<sub>2</sub>-flushed sealed Balch tube. Two milliliters of *S. gordonii* culture or 2 mL of sterile media was then added to each tube. Two milliliters of *A. actinomycetemcomitans* culture was added to each tube and incubated at 37 °C for 15 min. Another 200 μL of heat-inactivated or untreated 5,000 U/mL catalase was added to each culture and allowed to incubate for an additional 15 min. An equal volume of normal human serum (2 mL; Valley Biomedical) or complement-inactivated serum was added to each culture and allowed to incubate for 2 h. One milliliter of culture was removed before serum addition for microscopic analysis, and 1 mL was removed for serial dilution and plate counting.

**RT-PCR Primers.** Primers *clpX*-for (5'-gcagaacctggcgcgatg-3') and *clpX*-rev (5'-caattcgcttaattggcgccac-3') were used for *clpX* amplification, primers *katA*-for (5'-cggccgcttactgttacaagatg-3') and *katA*-rev (5'-gataaagctgtaagtgtggctgc-3') were used for *katA* amplification, and primers *apiA*-for (5'-cactggtgcaatttctgcaatg-3') and *apiA*-rev (5'-gaatttctgcaatgctgctg-3') were used for *apiA* amplification. For visualization, 5 μL of the resulting PCR was subjected to agarose gel electrophoresis and stained with ethidium bromide.

**luxCDABE Reporter Fusion Construction.** To study *katA* and *apiA* promoter activity in *A. actinomycetemcomitans*, the vectors pMR310-*katA* and pMR310-*apiA* were constructed. pMR310 incorporates a 5.8-kb region containing the *Photobacterium luminescens* *luxCDABE* operon from the vector pCGLS1 (1). This region was PCR-amplified with the addition of BamHI and NotI restriction sites at the 5' end and a SalI site at the 3' end.

Transcriptional TGA stop codons were also added to the 5' primer in all 3 frames using the following primers: LuxCE-for (5'-atacgggcccgtgaatgaatgaggcaaatatgactaaa-3') and LuxCE-rev (5'-acgcgtcgacatatcaactatcaaacgcttcgg-3'). This promoterless fragment was cloned into the BamHI and SalI restriction sites in the spectinomycin-resistant cloning vector pDMG4 (2), creating the promoterless *luxCDABE* expression vector pMR310. The *A. actinomycetemcomitans* *katA* promoter region was PCR-amplified with the addition of the BamHI and NotI restriction sites at the 5' and 3' ends, respectively, using the primers *katA*pro-5' (5'-cgggatcctaatcggtcagaaaaaacaccgt-3') and *katA*pro-3' (5'-ataagaatcgggccgctgacataatgcttctctaat-3'). The *apiA* promoter region was amplified with identical restriction sites using the primers *apiA*pro-5' (5'-cgggatccctcgcgaggttaatttacc-3') and *apiA*pro-3' (5'-ataagaatcgggccgcaacgaggtggtttaaataa-3'). Amplified fragments were restriction digested and ligated into pMR310 to create the *katA* reporter vector pMR310-*katA* and the *apiA* reporter vector pMR310-*apiA*. Plasmids were transformed into *E. coli* DH5α cells and then electroporated into *A. actinomycetemcomitans* (3).

**Construction and Complementation of an *oxyR*<sup>-</sup> Mutant in *A. actinomycetemcomitans*.** Construction of the *oxyR*<sup>-</sup> mutant was performed as previously described (4) using the primers *oxyR*KO-for (5'-cgggaattcggtattctgtcatgtaagccaac-3') and *oxyR*KO-rev (5'-cgggaattcgttgactcaataaaggctca-3') to amplify a 413-bp internal fragment of the *oxyR* gene. This fragment was digested with EcoRI and ligated into the suicide plasmid pVT1461 (5) to generate the vector pVT1461-*oxyR*ko. Plasmids were transformed and screened as described (4), and insertion into *oxyR* was confirmed using PCR. Complementation of *oxyR* in trans was performed using the *A. actinomycetemcomitans* streptomycin-resistant expression vector pYGS (6). The 1,068-bp *oxyR*-containing fragment was amplified using the primers *oxyR*Pro-full-for (5'-ccaagcttccatattagacatgattttctcc-3') and *oxyR*-full-rev (5'-cgggaattcccattaagaagataagatagatttacc-3') and cloned into HindIII/EcoRI-digested pYGS to yield the complement vector pYGS-*OxyR*C, which was introduced into *A. actinomycetemcomitans* by electroporation. Construction of the constitutive *apiA* expression vector was carried out using the primers and methods given by Yue *et al.* (7).

1. Frackman S, Anhalt M, Neelson KH (1990) Cloning, organization, and expression of the bioluminescence genes of *Xenorhabdus luminescens*. *J Bacteriol* 172:5767–5773.
2. Galli DM, Polan-Curtain JL, LeBlanc DJ (1996) Structural and segregational stability of various replicons in *Actinobacillus actinomycetemcomitans*. *Plasmid* 36:42–48.
3. Sreenivasan PK, LeBlanc DJ, Lee LN, Fives-Taylor P (1991) Transformation of *Actinobacillus actinomycetemcomitans* by electroporation, utilizing constructed shuttle plasmids. *Infect Immun* 59:4621–4627.
4. Brown SA, Whiteley M (2007) A novel exclusion mechanism for carbon resource partitioning in *Aggregatibacter actinomycetemcomitans*. *J Bacteriol* 189:6407–6414.
5. Mintz KP, Brissette C, Fives-Taylor PM (2002) A recombinase A-deficient strain of *Actinobacillus actinomycetemcomitans* constructed by insertional mutagenesis using a mobilizable plasmid. *FEMS Microbiol Lett* 206:87–92.
6. Fong KP, Gao L, Demuth DR (2003) *luxS* and *arcB* control aerobic growth of *Actinobacillus actinomycetemcomitans* under iron limitation. *Infect Immun* 71:298–308.
7. Yue G, *et al.* (2007) A second *Aggregatibacter actinomycetemcomitans* autotransporter adhesin exhibits specificity for buccal epithelial cells in humans and Old World primates. *Infect Immun* 75:4440–4448.

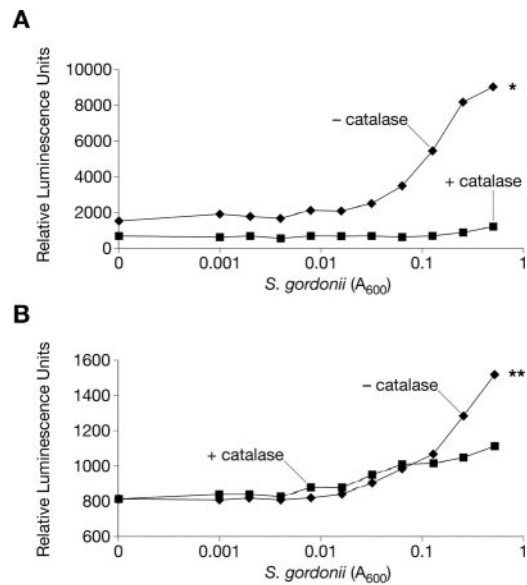

**Fig. 51.** Light production (relative luminescence units) by *A. actinomycetemcomitans* carrying *katA-luxCDABE* (A) or *apiA-luxCDABE* (B) during coculture with differing concentrations of *S. gordonii* in the presence of heat-inactivated (– catalase) or active catalase (+ catalase). SEM was <6% for all measurements and was omitted for clarity. \* $P < 0.0007$ , \*\* $P < 0.01$  via Student's  $t$  test,  $n = 4$ . For these experiments, *katA* and *apiA* promoter induction in cocultures was measured by monitoring luminescence using a Thermo Luminoskan Ascent microplate reader (Thermo Electron Co.). *A. actinomycetemcomitans* carrying either the *apiA-luxCDABE* or *katA-luxCDABE* was grown to an  $A_{600}$  of 0.8 in BHI containing 50  $\mu\text{g}/\text{mL}$  spectinomycin, diluted to an  $A_{600}$  of 0.1, and grown to midlogarithmic growth phase ( $A_{600}$  of 0.4). Cells were then diluted again in BHI to an  $A_{600}$  of 0.1 and 100  $\mu\text{L}$  transferred into a 96-well microtiter dish. One hundred microliters of midlog *S. gordonii* cells ( $A_{600}$  of 0.5) was concentrated to an  $A_{600}$  of 2.0 by centrifugation and resuspension and added to the first row of wells, then diluted 1:2 across the entire plate, omitting the last row as an untreated control. The microtiter dishes were incubated at 37  $^{\circ}\text{C}$  for 30 min before measuring luminescence in each well.
